# Supplementary material
Source: Springer Nature journal article supplement (https://www.springermedizin.de/resource/supplementary/12875_2012_831_MOESM2_ESM.pdf/9435616)
Supplement: MOESM2 [file 9435616]

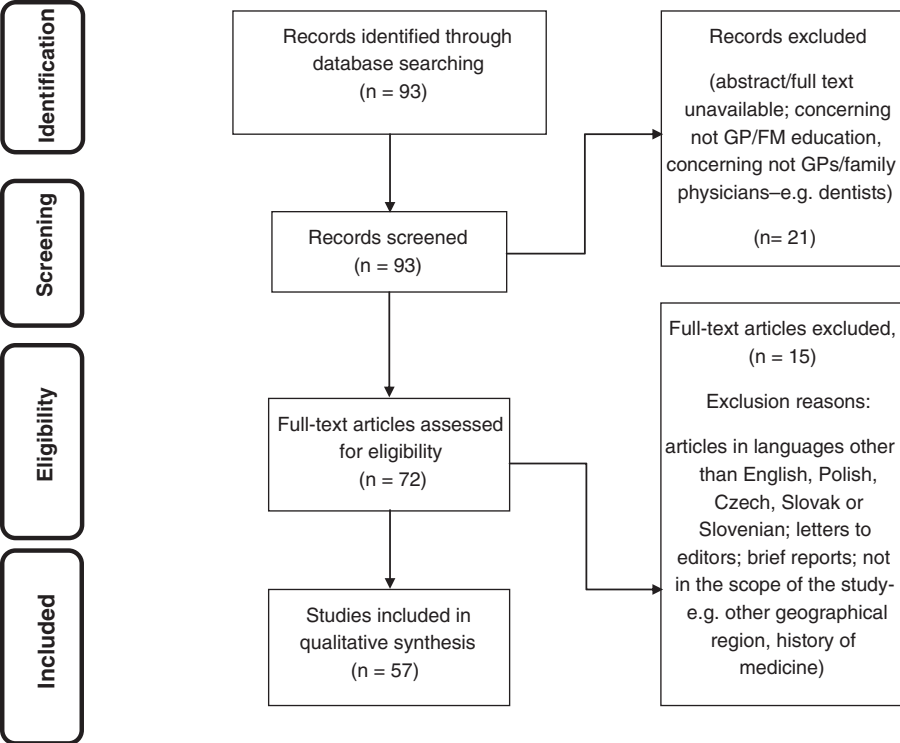

E-database search strategy (EMBASE incl. MEDLINE records, Embase Emtree terms used)

#1: 'family medicine'/exp OR 'general practice'/exp AND [1990-2008]/py

#2: 'medical education'/exp OR 'vocational education'/exp OR 'postgraduate education'/exp

#3: #1 AND 2

#4: 'eastern europe'/exp

#5: #3 AND #4
